# Supplementary material for: Reducing Energy Requirements in Future Bioregenerative Life Support Systems (BLSSs): Performance and Bioactive Composition of Diverse Lettuce Genotypes Grown Under Optimal and Suboptimal Light Conditions
Source: Front Plant Sci. 2019 Oct 30;10:1305. doi: 10.3389/fpls.2019.01305 (PMC6831738; doi:10.3389/fpls.2019.01305)
Supplement: Supplementary Material 2 — All experimental data subjected to the analysis of variance (ANOVA). [file Table_3.xlsx]

## Sheet: Optimal light
Record	DAT	Hour	T (°C)	RH (%)
1	1	800	23.54	66.29
2	1	900	24.93	64.7
3	1	1000	23.79	64.02
4	1	1100	24.48	64.46
5	1	1200	24.54	61.19
6	1	1300	23.83	60.48
7	1	1400	24.68	60.68
8	1	1500	24.58	61.12
9	1	1600	24.68	62.06
10	1	1700	24.27	61.62
11	1	1800	24.2	63.99
12	1	1900	24.97	69.67
13	1	2000	21.18	66.22
14	1	2100	17.76	74.15
15	1	2200	17.65	74.97
16	1	2300	17.59	77.06
17	1	2400	18.04	79.3
18	2	100	18.12	78.53
19	2	200	17.8	78.38
20	2	300	18.08	80.37
21	2	400	18.07	79.48
22	2	500	17.79	79.93
23	2	600	18.22	80.06
24	2	700	17.79	79.29
25	2	800	23.05	66.16
26	2	900	23.15	66.16
27	2	1000	23.84	65.89
28	2	1100	23.74	66.12
29	2	1200	23.67	66.39
30	2	1300	23.73	66.61
31	2	1400	23.78	66.29
32	2	1500	23.96	65.76
33	2	1600	23.99	66.25
34	2	1700	23.96	65.92
35	2	1800	23.99	66.14
36	2	1900	23.04	66.32
37	2	2000	21.47	68.62
38	2	2100	17.53	74.12
39	2	2200	17.46	76.97
40	2	2300	18.06	80.39
41	2	2400	18.08	78.42
42	3	100	17.8	78.46
43	3	200	18.13	80.67
44	3	300	18.06	78.93
45	3	400	17.8	78.74
46	3	500	18.08	80.15
47	3	600	18.1	79.26
48	3	700	17.79	79.27
49	3	800	23.29	68.79
50	3	900	24.3	67.7
51	3	1000	24.6	66.82
52	3	1100	23.95	66.24
53	3	1200	23.13	66.28
54	3	1300	23.38	65.5
55	3	1400	23.53	65.36
56	3	1500	23.66	65.29
57	3	1600	23.73	65.15
58	3	1700	23.89	65
59	3	1800	24.03	64.52
60	3	1900	24.09	64.24
61	3	2000	23.78	66.5
62	3	2100	18.04	70.72
63	3	2200	17.55	73.42
64	3	2300	17.58	77.46
65	3	2400	18.2	79.5
66	4	100	17.89	76.9
67	4	200	17.92	79.45
68	4	300	18.19	79.06
69	4	400	17.91	77.9
70	4	500	17.86	79.1
71	4	600	18.22	80.19
72	4	700	17.86	77.98
73	4	800	23.07	63.98
74	4	900	24.46	63.81
75	4	1000	24.04	64.9
76	4	1100	24.48	65
77	4	1200	24.89	65.15
78	4	1300	23.85	65.15
79	4	1400	23.97	65.38
80	4	1500	23.96	65.01
81	4	1600	24.06	65.36
82	4	1700	24.2	65.43
83	4	1800	24.44	65.31
84	4	1900	24.45	65.28
85	4	2000	24.31	69.94
86	4	2100	17.93	71.64
87	4	2200	17.57	71.8
88	4	2300	17.54	73.63
89	4	2400	18.13	75.14
90	5	100	18.04	73.4
91	5	200	17.82	73.53
92	5	300	18.04	75.19
93	5	400	18.14	74.03
94	5	500	17.88	73.45
95	5	600	17.87	74.46
96	5	700	18.3	75.58
97	5	800	24.51	64.12
98	5	900	24.17	68.49
99	5	1000	25.57	66.12
100	5	1100	24.37	63.59
101	5	1200	24.58	65.04
102	5	1300	24.94	64.67
103	5	1400	24	64.03
104	5	1500	24.06	69.66
105	5	1600	24.77	68.5
106	5	1700	24.53	66.34
107	5	1800	24.69	65.79
108	5	1900	24.29	67.16
109	5	2000	24.92	69.97
110	5	2100	18.25	70.2
111	5	2200	17.53	72.84
112	5	2300	17.54	77.7
113	5	2400	17.95	78.26
114	6	100	18.04	77.98
115	6	200	18.04	77.68
116	6	300	18.04	77.68
117	6	400	18.02	77.22
118	6	500	17.85	77.33
119	6	600	17.98	79.42
120	6	700	18.58	78.55
121	6	800	25.08	69.84
122	6	900	24.18	63.91
123	6	1000	25.03	62.08
124	6	1100	25.26	62.53
125	6	1200	25.55	62.21
126	6	1300	24.08	63.32
127	6	1400	24.43	62.16
128	6	1500	24.39	62.19
129	6	1600	24.59	63.82
130	6	1700	24.87	63.7
131	6	1800	25.11	63.37
132	6	1900	24.76	64.44
133	6	2000	24.59	68.46
134	6	2100	18.39	74.81
135	6	2200	17.62	77.69
136	6	2300	17.45	72
137	6	2400	17.95	73.82
138	7	100	18.1	72.97
139	7	200	17.96	72.49
140	7	300	17.94	72.79
141	7	400	18.02	74.51
142	7	500	18.08	72.89
143	7	600	17.85	73.91
144	7	700	18.57	75.83
145	7	800	23.49	68.46
146	7	900	24.77	62.17
147	7	1000	24.7	68.99
148	7	1100	24.23	64.5
149	7	1200	23.69	65.13
150	7	1300	23.73	65.22
151	7	1400	23.69	65.2
152	7	1500	23.78	65
153	7	1600	23.74	65.11
154	7	1700	23.76	65.21
155	7	1800	23.75	64.05
156	7	1900	23.54	64.88
157	7	2000	23.84	69.66
158	7	2100	17.67	74.62
159	7	2200	17.42	74.01
160	7	2300	17.89	76.24
161	7	2400	18.04	76.3
162	8	100	18.04	76.29
163	8	200	18.05	76.21
164	8	300	17.98	76.14
165	8	400	17.94	76.33
166	8	500	18.05	77.17
167	8	600	17.94	77.32
168	8	700	18.21	78.05
169	8	800	23.81	65.56
170	8	900	23.56	63.91
171	8	1000	23.65	64.81
172	8	1100	23.75	65.33
173	8	1200	23.71	63.86
174	8	1300	23.87	63.25
175	8	1400	23.77	64.49
176	8	1500	23.87	63.9
177	8	1600	23.9	65.63
178	8	1700	23.96	64.99
179	8	1800	23.97	64.34
180	8	1900	23.71	64.44
181	8	2000	23.95	65.08
182	8	2100	17.91	73.19
183	8	2200	17.31	72.13
184	8	2300	17.82	75.53
185	8	2400	18.06	75.98
186	9	100	17.92	75.52
187	9	200	18.01	76.45
188	9	300	18.04	76.38
189	9	400	17.97	76.61
190	9	500	17.93	77.2
191	9	600	18.05	77.84
192	9	700	18.23	79.09
193	9	800	23.63	79.18
194	9	900	23.55	63.46
195	9	1000	23.6	64.27
196	9	1100	23.63	63.29
197	9	1200	23.71	64.14
198	9	1300	23.68	64.75
199	9	1400	23.7	63.53
200	9	1500	23.78	62.57
201	9	1600	23.8	62.63
202	9	1700	23.74	62.7
203	9	1800	23.79	63.03
204	9	1900	23.63	62.45
205	9	2000	23.74	64.65
206	9	2100	17.41	72.6
207	9	2200	17.57	76.14
208	9	2300	18.09	77.89
209	9	2400	17.86	77.42
210	10	100	18.11	78.44
211	10	200	17.9	77.35
212	10	300	18.05	78.68
213	10	400	18	77.99
214	10	500	18.03	78.78
215	10	600	17.96	78.46
216	10	700	18.32	79.77
217	10	800	23.73	74.78
218	10	900	23.9	65.01
219	10	1000	24.04	62.2
220	10	1100	24.12	62.46
221	10	1200	24.09	62.6
222	10	1300	24.14	62.75
223	10	1400	24.21	62.64
224	10	1500	24.23	62.44
225	10	1600	24.31	62.13
226	10	1700	24.3	62.11
227	10	1800	24.31	61.82
228	10	1900	23.99	62.32
229	10	2000	23.72	64.49
230	10	2100	17.26	71.69
231	10	2200	17.71	77.43
232	10	2300	18.06	78.23
233	10	2400	18.01	78.02
234	11	100	17.95	77.96
235	11	200	17.96	78.08
236	11	300	17.96	78.35
237	11	400	18	78.51
238	11	500	17.99	78.74
239	11	600	18	79.35
240	11	700	18.21	79.7
241	11	800	23.78	60.66
242	11	900	23.75	65.7
243	11	1000	23.75	65.02
244	11	1100	23.76	64.52
245	11	1200	23.74	64.77
246	11	1300	23.71	63.9
247	11	1400	23.69	65.19
248	11	1500	23.87	63.7
249	11	1600	23.94	62.49
250	11	1700	24.03	61.51
251	11	1800	24.77	65.41
252	11	1900	24.97	66.19
253	11	2000	24.35	64.37
254	11	2100	17.67	67.87
255	11	2200	17.39	73.93
256	11	2300	17.88	76.14
257	11	2400	17.99	76.7
258	12	100	18.08	76.29
259	12	200	17.96	77.13
260	12	300	17.94	76.47
261	12	400	18.02	77.12
262	12	500	18.03	77.67
263	12	600	18.01	78.4
264	12	700	18	78.2
265	12	800	22.95	65.88
266	12	900	23.61	64.87
267	12	1000	23.66	64.94
268	12	1100	23.64	65.05
269	12	1200	23.59	65.98
270	12	1300	23.57	65.98
271	12	1400	23.71	66.64
272	12	1500	23.74	67.81
273	12	1600	23.72	65.98
274	12	1700	23.72	66.87
275	12	1800	23.68	66.67
276	12	1900	23.7	66.88
277	12	2000	23.39	61.87
278	12	2100	17.75	66.27
279	12	2200	17.36	74.37
280	12	2300	17.99	76.1
281	12	2400	17.91	76.46
282	13	100	18.04	76.56
283	13	200	18.04	76.48
284	13	300	18	76.44
285	13	400	17.91	76.51
286	13	500	18.07	77.61
287	13	600	17.9	77.21
288	13	700	18.11	78.54
289	13	800	22.88	68.39
290	13	900	23.37	60.96
291	13	1000	23.48	60.88
292	13	1100	23.46	60.25
293	13	1200	23.66	63.47
294	13	1300	23.9	63.04
295	13	1400	23.6	65.43
296	13	1500	23.53	68.4
297	13	1600	23.49	68.02
298	13	1700	23.67	67.41
299	13	1800	23.62	67.15
300	13	1900	23.42	67.3
301	13	2000	23.64	65.65
302	13	2100	17.41	79.97
303	13	2200	17.61	76.03
304	13	2300	18	76.83
305	13	2400	18	76.97
306	14	100	18.09	77.37
307	14	200	17.92	77.35
308	14	300	18.01	77.67
309	14	400	18.03	77.53
310	14	500	17.99	77.99
311	14	600	18.01	78.21
312	14	700	18.22	78.43
313	14	800	23.68	67.62
314	14	900	23.21	61.8
315	14	1000	23.78	62.84
316	14	1100	23.8	62.52
317	14	1200	23.47	65.13
318	14	1300	23.63	65.85
319	14	1400	23.6	65.71
320	14	1500	23.72	65.3
321	14	1600	23.78	65.23
322	14	1700	23.74	65.65
323	14	1800	23.85	65.31
324	14	1900	23.6	65.35
325	14	2000	24.75	64.06
326	14	2100	17.44	70.21
327	14	2200	17.56	75.41
328	14	2300	17.99	76.69
329	14	2400	17.91	76.28
330	15	100	18.03	76.74
331	15	200	17.92	76.96
332	15	300	17.96	76.87
333	15	400	18.13	77.47
334	15	500	17.97	77.37
335	15	600	17.93	76.87
336	15	700	18.27	78.4
337	15	800	23.65	64.59
338	15	900	23.7	65.51
339	15	1000	23.79	64.48
340	15	1100	24	61.02
341	15	1200	23.96	61.28
342	15	1300	23.98	61.37
343	15	1400	23.85	63.24
344	15	1500	23.98	60.88
345	15	1600	24	60.64
346	15	1700	23.92	61.33
347	15	1800	24	61.25
348	15	1900	23.68	61.8
349	15	2000	24.72	65.46
350	15	2100	17.34	72.21
351	15	2200	17.6	75.48
352	15	2300	18.03	76.5
353	15	2400	17.9	76.04
354	16	100	18.01	76.43
355	16	200	17.96	76.5
356	16	300	18.08	77.27
357	16	400	18	76.63
358	16	500	18.01	77.62
359	16	600	17.93	77.38
360	16	700	18.27	78.08
361	16	800	23.65	64.51
362	16	900	23.72	66.88
363	16	1000	23.92	63.15
364	16	1100	23.99	62.82
365	16	1200	23.98	63.08
366	16	1300	24	63.13
367	16	1400	23.99	63.25
368	16	1500	24	63.03
369	16	1600	24.07	63.17
370	16	1700	24.07	63.1
371	16	1800	24.03	63.48
372	16	1900	23.74	64.21
373	16	2000	23.69	64.13
374	16	2100	17.39	77.73
375	16	2200	17.54	74.35
376	16	2300	18	75.59
377	16	2400	17.95	75.56
378	17	100	18.04	76.38
379	17	200	18.06	75.96
380	17	300	17.97	76.77
381	17	400	17.96	76.42
382	17	500	18.04	76.88
383	17	600	18.01	76.96
384	17	700	18.16	76.89
385	17	800	23.75	62.64
386	17	900	23.89	64.13
387	17	1000	24.02	63.53
388	17	1100	24.03	63.79
389	17	1200	24.12	63.88
390	17	1300	24.18	64.89
391	17	1400	24.13	64.59
392	17	1500	24.3	64.19
393	17	1600	24.46	63.84
394	17	1700	24.61	63.78
395	17	1800	24.74	63.87
396	17	1900	24.62	63.89
397	17	2000	24.04	64.75
398	17	2100	17.77	77.15
399	17	2200	17.37	72.05
400	17	2300	17.88	74.75
401	17	2400	17.97	75.52
402	18	100	17.94	75.55
403	18	200	18.11	76.08
404	18	300	17.93	75.61
405	18	400	18.06	76.37
406	18	500	18.04	77.08
407	18	600	17.92	77.17
408	18	700	18.21	77.43
409	18	800	23.79	60.08
410	18	900	23.87	65.07
411	18	1000	24.01	64.56
412	18	1100	24.02	64.61
413	18	1200	24.02	64.61
414	18	1300	24.05	65.56
415	18	1400	24.13	66.26
416	18	1500	24.12	66.3
417	18	1600	24.12	67.03
418	18	1700	24.12	67.08
419	18	1800	24.13	64.74
420	18	1900	23.84	64
421	18	2000	24.67	64.25
422	18	2100	17.35	69.68
423	18	2200	17.66	75.56
424	18	2300	17.96	76.35
425	18	2400	17.96	76.05
426	19	100	18.04	76.87
427	19	200	18.08	77.17
428	19	300	17.88	76.87
429	19	400	18.03	77.48
430	19	500	17.99	78.47
431	19	600	18	78.71
432	19	700	18.29	79.38
433	19	800	23.74	60.07
434	19	900	23.74	64.23
435	19	1000	23.69	66.14
436	19	1100	23.48	65.27
437	19	1200	23.55	64.59
438	19	1300	23.51	65.9
439	19	1400	23.57	66.14
440	19	1500	23.58	65
441	19	1600	23.66	64.75
442	19	1700	23.77	65.02
443	19	1800	23.67	65.36
444	19	1900	23.38	64.85
445	19	2000	23.67	69.29

## Sheet: Low light
Record	DAT	Hour	T (°C)	RH (%)
1	1	800	23.7	63.38
2	1	900	23.43	63.89
3	1	1000	23.51	62.8
4	1	1100	23.65	64.14
5	1	1200	23.7	63.17
6	1	1300	23.66	63.89
7	1	1400	23.69	62.89
8	1	1500	23.73	62.93
9	1	1600	23.74	62.85
10	1	1700	23.79	62.91
11	1	1800	23.82	63.92
12	1	1900	23.51	63.12
13	1	2000	23.76	68.03
14	1	2100	17.41	77.1
15	1	2200	17.64	77.51
16	1	2300	17.94	78.08
17	1	2400	17.96	78.24
18	2	100	18.03	78.35
19	2	200	18.02	78.36
20	2	300	18.01	78.82
21	2	400	18.06	78.67
22	2	500	17.96	79.31
23	2	600	17.93	79.02
24	2	700	18.24	79.32
25	2	800	23.69	65.72
26	2	900	23.59	63.78
27	2	1000	23.69	62.61
28	2	1100	23.65	63.67
29	2	1200	24.38	65.58
30	2	1300	22.15	66.22
31	2	1400	22.81	65.67
32	2	1500	23.02	64.52
33	2	1600	23.06	64.29
34	2	1700	22.99	70.68
35	2	1800	23.11	67.62
36	2	1900	22.95	68.12
37	2	2000	23.23	68.58
38	2	2100	17.81	76.45
39	2	2200	17.4	76.75
40	2	2300	17.94	79.07
41	2	2400	18.03	79.07
42	3	100	17.94	78.97
43	3	200	18.28	79.41
44	3	300	17.81	79.61
45	3	400	18.16	79.83
46	3	500	17.81	79.17
47	3	600	18.06	78.85
48	3	700	18.18	79.41
49	3	800	23.94	62.58
50	3	900	23.72	64.95
51	3	1000	23.58	64.39
52	3	1100	23.16	64.27
53	3	1200	23.04	66.05
54	3	1300	23.04	64.3
55	3	1400	22.72	65.39
56	3	1500	23.16	64.19
57	3	1600	23.04	63.17
58	3	1700	23.28	63.17
59	3	1800	23.02	64.98
60	3	1900	23.03	63.63
61	3	2000	23.03	65.12
62	3	2100	17.26	77.48
63	3	2200	17.4	77.45
64	3	2300	17.68	77.04
65	3	2400	18.04	77.99
66	4	100	17.96	78.01
67	4	200	17.99	78.55
68	4	300	18.02	78.1
69	4	400	18.04	79.12
70	4	500	17.94	78.35
71	4	600	18.08	79.34
72	4	700	17.94	79.14
73	4	800	24	65.06
74	4	900	23.36	66.78
75	4	1000	23.33	65.72
76	4	1100	23.05	65.36
77	4	1200	23.04	62.21
78	4	1300	23.13	64.6
79	4	1400	23.07	62.1
80	4	1500	23	64.48
81	4	1600	23.99	64.94
82	4	1700	23.06	63.29
83	4	1800	23.07	63.19
84	4	1900	24.95	63.78
85	4	2000	23.09	63.17
86	4	2100	18.32	66.81
87	4	2200	17.42	72.29
88	4	2300	17.69	77.21
89	4	2400	18.02	77.25
90	5	100	17.87	77.08
91	5	200	17.95	77.64
92	5	300	18.13	77.76
93	5	400	17.89	77.82
94	5	500	17.98	77.53
95	5	600	18.06	78.6
96	5	700	17.93	78.12
97	5	800	17.99	78.19
98	5	900	23.2	66.14
99	5	1000	24.31	68.14
100	5	1100	24.09	62.34
101	5	1200	23.99	63.1
102	5	1300	23.98	62.95
103	5	1400	24.04	63.67
104	5	1500	24.03	64.16
105	5	1600	23.96	64.69
106	5	1700	24	63.43
107	5	1800	24.01	64.82
108	5	1900	24.07	65.23
109	5	2000	24.1	64.11
110	5	2100	17.39	71.9
111	5	2200	17.48	71.71
112	5	2300	17.62	76.01
113	5	2400	17.94	77.28
114	6	100	18.08	77.63
115	6	200	18.01	77.25
116	6	300	17.9	77.51
117	6	400	17.96	77.49
118	6	500	17.96	77.88
119	6	600	18.03	77.85
120	6	700	18	78.43
121	6	800	24.93	78.48
122	6	900	23.28	64.72
123	6	1000	24.29	65.48
124	6	1100	24.11	63.19
125	6	1200	23.99	63.84
126	6	1300	24.05	63.08
127	6	1400	24.08	62.73
128	6	1500	23.99	63.68
129	6	1600	24.04	63.55
130	6	1700	24	63.61
131	6	1800	24.05	62.94
132	6	1900	24.08	63.35
133	6	2000	24.03	62.85
134	6	2100	17.37	72.78
135	6	2200	17.47	72.05
136	6	2300	17.62	75.26
137	6	2400	17.94	75.6
138	7	100	17.94	75.92
139	7	200	18.13	76.82
140	7	300	17.93	76.31
141	7	400	18.01	77.31
142	7	500	18.07	77.1
143	7	600	18.01	76.9
144	7	700	17.9	77.29
145	7	800	23.07	68.14
146	7	900	23.76	65.04
147	7	1000	24.84	66.85
148	7	1100	24.54	62.78
149	7	1200	24.55	62.61
150	7	1300	24.55	62
151	7	1400	24.43	62.2
152	7	1500	24.47	62.12
153	7	1600	24.54	62.79
154	7	1700	24.44	63.62
155	7	1800	24.51	63.73
156	7	1900	24.62	63.04
157	7	2000	24.53	63.46
158	7	2100	17.34	73.19
159	7	2200	17.38	73.03
160	7	2300	17.71	76.17
161	7	2400	17.9	76.12
162	8	100	18.07	76.71
163	8	200	17.94	76.76
164	8	300	18.08	76.75
165	8	400	17.9	77.17
166	8	500	18.09	77.43
167	8	600	17.9	77.32
168	8	700	18.06	78.28
169	8	800	17.88	78.71
170	8	900	23.87	66.66
171	8	1000	24.98	68.23
172	8	1100	24.6	64.85
173	8	1200	24.62	65.42
174	8	1300	24.58	62.79
175	8	1400	24.68	63.32
176	8	1500	24.61	63.06
177	8	1600	24.6	62.91
178	8	1700	24.59	63.26
179	8	1800	24.64	63.09
180	8	1900	24.59	63.49
181	8	2000	24.61	62.83
182	8	2100	17.2	76.43
183	8	2200	17.29	72.7
184	8	2300	17.74	76.26
185	8	2400	18.02	76.25
186	9	100	18.02	76.14
187	9	200	17.92	76.26
188	9	300	17.98	77.17
189	9	400	18.07	77.2
190	9	500	17.96	76.97
191	9	600	17.92	77.8
192	9	700	18.04	77.9
193	9	800	23.97	78.52
194	9	900	23.13	64.59
195	9	1000	24.24	63.44
196	9	1100	24.1	62.17
197	9	1200	23.96	62.9
198	9	1300	23.94	63.73
199	9	1400	23.98	64.97
200	9	1500	24.05	65.92
201	9	1600	24.06	64.07
202	9	1700	24.06	62.62
203	9	1800	23.91	62.51
204	9	1900	24.08	62.58
205	9	2000	23.98	62.17
206	9	2100	17.03	76.31
207	9	2200	17.23	74.85
208	9	2300	17.88	77.78
209	9	2400	17.93	78.14
210	10	100	17.99	78.01
211	10	200	17.94	78.32
212	10	300	18.03	78.66
213	10	400	18.04	78.54
214	10	500	18.05	78.52
215	10	600	17.96	78.68
216	10	700	17.93	78.94
217	10	800	23.99	68.98
218	10	900	23.37	66.76
219	10	1000	24.53	68.08
220	10	1100	24.29	68.8
221	10	1200	24.11	65.7
222	10	1300	24.17	63.99
223	10	1400	24.25	63.56
224	10	1500	24.18	63.08
225	10	1600	24.23	62.72
226	10	1700	24.23	62.62
227	10	1800	24.15	63.03
228	10	1900	24.18	62.38
229	10	2000	24.21	62.43
230	10	2100	17.98	75.84
231	10	2200	17.27	74.36
232	10	2300	17.88	77.29
233	10	2400	18.03	77.28
234	11	100	17.9	77.42
235	11	200	18.1	78.02
236	11	300	17.93	77.57
237	11	400	17.98	77.17
238	11	500	18.09	77.77
239	11	600	17.88	77.6
240	11	700	18.01	77.8
241	11	800	24.07	68.4
242	11	900	23.23	64.92
243	11	1000	24.41	64.2
244	11	1100	24.16	64.76
245	11	1200	24.05	64.43
246	11	1300	24.16	63.9
247	11	1400	24.12	64.07
248	11	1500	24.07	63.19
249	11	1600	24.09	63.14
250	11	1700	24.15	63.92
251	11	1800	24.09	63.63
252	11	1900	24.12	63.98
253	11	2000	24.05	64.08
254	11	2100	17.05	75.97
255	11	2200	17.25	73.23
256	11	2300	17.8	76.26
257	11	2400	18.08	77.29
258	12	100	17.91	76.49
259	12	200	17.97	76.95
260	12	300	18.03	77.53
261	12	400	18.01	78.02
262	12	500	18.02	77.51
263	12	600	17.96	77.89
264	12	700	18.01	78.41
265	12	800	23.91	68.68
266	12	900	23.27	66.89
267	12	1000	24.48	66.43
268	12	1100	24.34	67.26
269	12	1200	24.13	65.97
270	12	1300	24.18	61.96
271	12	1400	24.21	62.12
272	12	1500	24.2	63.84
273	12	1600	24.23	63.66
274	12	1700	24.18	63.29
275	12	1800	24.24	68.53
276	12	1900	24.14	64.49
277	12	2000	24.39	66.78
278	12	2100	17.81	70.45
279	12	2200	17.4	74.75
280	12	2300	17.94	77.07
281	12	2400	18.03	77.07
282	13	100	17.94	76.97
283	13	200	18.28	78.41
284	13	300	17.81	77.61
285	13	400	18.16	77.83
286	13	500	17.81	78.17
287	13	600	18.06	76.85
288	13	700	18.18	79.41
289	13	800	23.94	68.58
290	13	900	23.92	67.95
291	13	1000	24.78	63.39
292	13	1100	24.36	64.27
293	13	1200	24.24	64.05
294	13	1300	24.24	63.3
295	13	1400	23.92	63.39
296	13	1500	24.36	65.19
297	13	1600	24.24	64.17
298	13	1700	24.48	64.17
299	13	1800	24.04	64.63
300	13	1900	24.14	63.39
301	13	2000	24.48	64.83
302	13	2100	17.94	77.67
303	13	2200	17.3	75.09
304	13	2300	18.03	77.95
305	13	2400	17.94	76.87
306	14	100	17.96	77.44
307	14	200	18.06	78.31
308	14	300	17.94	76.87
309	14	400	18.16	78.71
310	14	500	17.81	78.29
311	14	600	18.18	77.7
312	14	700	18.16	79.19
313	14	800	23.84	67.97
314	14	900	23.72	68.05
315	14	1000	24.38	65.83
316	14	1100	24.16	62.29
317	14	1200	24.16	65.15
318	14	1300	23.94	65.42
319	14	1400	24.26	63.98
320	14	1500	24.04	65.05
321	14	1600	23.72	63.49
322	14	1700	24.16	63.49
323	14	1800	23.82	63.83
324	14	1900	24.26	65.66
325	14	2000	23.84	64.03
326	14	2100	18.03	72.99
327	14	2200	17.28	73.75
328	14	2300	17.81	77.19
329	14	2400	18.03	77.83
330	15	100	18.03	77.61
331	15	200	17.84	76.75
332	15	300	17.94	77.41
333	15	400	17.94	77.73
334	15	500	18.06	78.83
335	15	600	17.81	77.61
336	15	700	18.03	78.29
337	15	800	23.91	64.19
338	15	900	23.58	63.86
339	15	1000	24.06	62.17
340	15	1100	24.38	63.93
341	15	1200	24.04	63.81
342	15	1300	24.16	64.71
343	15	1400	24.26	65.97
344	15	1500	23.72	62.78
345	15	1600	23.72	64.37
346	15	1700	23.7	64.22
347	15	1800	24.04	64.49
348	15	1900	24.28	64.05
349	15	2000	24.04	63.69
350	15	2100	18.03	74.23
351	15	2200	17.28	74.53
352	15	2300	17.84	75.85
353	15	2400	17.94	75.41
354	16	100	17.91	76.97
355	16	200	18.16	76.73
356	16	300	17.84	76.75
357	16	400	18.06	77.41
358	16	500	18.03	77.07
359	16	600	17.94	76.97
360	16	700	17.81	77.95
361	16	800	23.94	63.48
362	16	900	23.68	64.2
363	16	1000	24.66	63.63
364	16	1100	24.14	63
365	16	1200	24.24	62.56
366	16	1300	24.26	63.05
367	16	1400	24.14	63.15
368	16	1500	24.24	64.73
369	16	1600	24.14	63.93
370	16	1700	24.24	64.86
371	16	1800	24.24	63.42
372	16	1900	24.34	64.32
373	16	2000	24.14	65.88
374	16	2100	17.94	75.67
375	16	2200	17.35	75.85
376	16	2300	17.89	75.97
377	16	2400	17.96	76.19
378	17	100	17.94	75.87
379	17	200	18.03	77.61
380	17	300	17.94	76.51
381	17	400	18.03	77.95
382	17	500	17.94	77.07
383	17	600	18.03	78.83
384	17	700	17.94	78.07
385	17	800	24.03	64.73
386	17	900	23.8	62.15
387	17	1000	24.42	63.81
388	17	1100	24.46	62.52
389	17	1200	24.14	65.93
390	17	1300	24.24	64.61
391	17	1400	24.04	63.37
392	17	1500	24.24	63.61
393	17	1600	24.36	63.17
394	17	1700	24.24	63.58
395	17	1800	24.36	64.32
396	17	1900	24.24	65.2
397	17	2000	24.14	63.32
398	17	2100	17.84	74.13
399	17	2200	17.35	75.53
400	17	2300	17.91	76.75
401	17	2400	18.03	75.97
402	18	100	17.94	76.07
403	18	200	17.84	76.51
404	18	300	18.03	77.41
405	18	400	18.03	77.07
406	18	500	17.94	77.07
407	18	600	18.16	78.8
408	18	700	17.81	77.12
409	18	800	23.89	64.7
410	18	900	23.94	63.61
411	18	1000	23.94	63.93
412	18	1100	23.94	63.52
413	18	1200	23.94	63.15
414	18	1300	23.94	64.86
415	18	1400	24.06	66.18
416	18	1500	24.16	64.49
417	18	1600	24.02	63.98
418	18	1700	24.16	63.81
419	18	1800	23.94	62.52
420	18	1900	24.16	63.83
421	18	2000	23.84	64.71
422	18	2100	17.47	74.7
423	18	2200	17.59	78.46
424	18	2300	17.94	77.48
425	18	2400	18.03	78.19
426	19	100	17.94	78.27
427	19	200	17.94	78.17
428	19	300	18.06	78.53
429	19	400	18.03	78.63
430	19	500	18.03	78.75
431	19	600	17.94	78.83
432	19	700	17.94	79.24
433	19	800	23.84	64.37
434	19	900	23.78	63.64
435	19	1000	24.42	64.07
436	19	1100	24.18	64.83
437	19	1200	24	64.67
438	19	1300	23.54	62.78
439	19	1400	23.44	63.83
440	19	1500	23.42	63.07
441	19	1600	23.54	62.12
442	19	1700	23.56	64.93
443	19	1800	23.44	63.98
444	19	1900	23.54	63.51
445	19	2000	23.44	62.17
